# Supplementary material for: Feasibility of the HEAR-aware App for Hearing Loss Self-Management: A Nonrandomized Intervention Study to Examine Intervention Acceptability and the Stages-of-Change Concept
Source: PubMed Central journal article supplement (PMC10718215; doi:10.1097/aud.0000000000001414), 2023-09-06
Supplement: aud-45-186-s002.pdf [file aud-45-186-s002.pdf]

## Supplemental Digital Content 2: Results

### Content:

- **TABLE SR1.** *Reported Reasons of Study Participants for Not Opting for a Hearing Aid (N = 29). Eleven Participants (38%) Reported Multiple Reasons*
- **TABLE SR2.** *Descriptive Sample Statistics (N=26)*
- **TABLE SR3.** *Types of Added Listening Situations by Participants (N =26)*
- **TABLE SR4.** *Descriptive Statistics of the Snippet Review Scores per Indicator, and of the EMA Evaluation Survey Question on the Snippet’s Usefulness*
- **TABLE SR5.** *Cross-tabulation of the Staging Algorithm Generic on T0 and T1. ICC = .74 (Good)*
- **TABLE SR6.** *Cross-tabulation of the Staging Algorithm Communication Strategies on T0 and T1. ICC = .72 (Good)*
- **TABLE SR7.** *Cross-tabulation of the Staging Algorithm Hearing Aids on T0 and T1. ICC = .80 (Excellent)*
- **TABLE SR8.** *Cross-tabulation of the Staging Algorithm Emotional Coping on T0 and T1. ICC = .51 (Fair)*
- **TABLE SR9.** *Cross-tabulation of the Staging Algorithm Social Support on T0 and T1. ICC = .72 (Good)*
- **TABLE SR10.** *Cross-tabulation of the Staging Algorithm Assistive Listening Devices on T0 and T1. ICC = .69 (Good)*
- **TABLE SR11.** *Correlation Coefficients (and their 95% Confidence Intervals) of the TB-specific and Generic SoC-scales, and Self-reported Hearing Disability, at T0 (N = 29)*
- **TABLE SR12.** *Frequencies of Combinations of SoC<sub>person</sub> and SoC<sub>snippet</sub>, with Associated SoC<sub>difference</sub> Scores Presented between Brackets (N = 25)*

**TABLE SR1.** *Reported Reasons of Study Participants for Not Opting for a Hearing Aid (N = 29).**Eleven Participants (38%) Reported Multiple Reasons*

| <b>Reason</b>                                                                                   | <b>Frequency</b> |
|-------------------------------------------------------------------------------------------------|------------------|
| 1. Does not feel ready yet for a HA (not specified)                                             | 11               |
| 2. Does not think hearing problems are severe enough                                            | 10               |
| 3. Hearing aid retailer or ENT doctor had indicated that hearing loss was ‘not that severe yet’ | 8                |
| 4. HAs too expensive                                                                            | 5                |
| 5. Vanity (visibility HAs)                                                                      | 5                |
| 6. Old-age stigma connected to HAs                                                              | 2                |
| 7. Low expectations of gain/sound quality                                                       | 1                |
| 8. Too many other health problems                                                               | 1                |
| 9. Reason unknown/unclear                                                                       | 2                |

HA, hearing aid. ENT, Ear Nose, and Throat.

**TABLE SR2.** *Descriptive Sample Statistics (N = 26)*

| <b>Measure</b>                         | <b>M (SD) or Mdn [25th and 75th Percentile Points] or N (%)</b> | <b>Actual Range</b> |
|----------------------------------------|-----------------------------------------------------------------|---------------------|
| Age (years)                            | 63.4 (8.3)                                                      | 51 - 79             |
| Men                                    | 18 (69%)                                                        | -                   |
| Level of education*                    |                                                                 | -                   |
| Low                                    | 2 (8%)                                                          |                     |
| Medium                                 | 18 (69%)                                                        |                     |
| High                                   | 6 (23%)                                                         |                     |
| Work status (paid work ≥ 1 hrs per wk) |                                                                 | -                   |
| Yes                                    | 15 (58%)                                                        |                     |
| No                                     | 11 (42%)                                                        |                     |
| Marital status                         |                                                                 | -                   |
| Married                                | 47 (65%)                                                        |                     |
| Cohabiting                             | 3 (12%)                                                         |                     |
| Widowed                                | 1 (4%)                                                          |                     |
| Divorced                               | 2 (8%)                                                          |                     |
| Single, never married                  | 3 (12%)                                                         |                     |
| Hearing loss better ear (PTA, dB HL)   | 34.2 (7.6)                                                      | 13.3 - 46.7         |
| Hearing loss poorer ear (PTA, dB HL)   | 38.3 [35.0 – 47.1]                                              | 35.0 - 71.7         |

dB HL, decibels hearing level; *M*, mean; *Mdn*, median; PTA, pure tone average hearing loss, measured across 1, 2 and 4 kHz; *SD*, standard deviation; -, not applicable.

\*Low: uncompleted elementary, elementary, lower vocational; medium: general intermediate, intermediate vocational, general secondary; high: higher vocational, college, and university.

**TABLE SR3.** *Types of Added Listening Situations by Participants (N = 26)*

| Type of Listening Situation                                                                        | Number of Listening Situations Added (Frequency) | Percentage of Total (Top-5 Indicated in Bold) | Unique Participants* (N) |
|----------------------------------------------------------------------------------------------------|--------------------------------------------------|-----------------------------------------------|--------------------------|
| 1. <b>(Video)calling</b>                                                                           | 58                                               | <b>9%</b>                                     | 19                       |
| 2. <b>1-on-1 conversation</b>                                                                      | 115                                              | <b>19%</b>                                    | 23                       |
| 3. <b>Group conversation, small (with 2-3 other persons)</b>                                       | 86                                               | <b>14%</b>                                    | 22                       |
| 4. <b>Group conversation, big (with 4 or more other persons)</b>                                   | 65                                               | <b>11%</b>                                    | 20                       |
| 5. Lecture/ presentation                                                                           | 16                                               | 3%                                            | 10                       |
| 6. Sports instruction                                                                              | 17                                               | 3%                                            | 8                        |
| 7. <b>Watching TV – On TV/PC/laptop</b>                                                            | 88                                               | <b>14%</b>                                    | 20                       |
| 8. Watching clips – On smartphone                                                                  | 6                                                | 1%                                            | 5                        |
| 9. Radio interview / podcast / audiobook                                                           | 7                                                | 1%                                            | 5                        |
| 10. Music                                                                                          | 12                                               | 2%                                            | 6                        |
| 11. Cycling (e.g., hearing other traffic approaching, hearing bicycle bells ringing/ cars honking) | 33                                               | 5%                                            | 11                       |
| 12. Driving the car (e.g., hearing other cars honking, emergency vehicles sirens)                  | 23                                               | 4%                                            | 12                       |
| 13. Using public transport (e.g., hearing check-in/check-out signals, public address systems)      | 7                                                | 1%                                            | 4                        |
| 14. Walking (e.g., hearing other traffic approaching, hearing bicycle bells ringing/ cars honking) | 13                                               | 2%                                            | 6                        |
| 15. Nature sounds (e.g., hearing birds singing, leafs rustling, sounds of the sea)                 | 13                                               | 2%                                            | 6                        |
| 16. Other, namely...                                                                               | 57                                               | 9%                                            | 14                       |
| Total                                                                                              | 616                                              | 100%                                          | -                        |

\* Unique number of participants that added  $\geq 1$  listening situations of the particular type.

HEAR-AWARE APP – ACCEPTABILITY AND STAGES OF CHANGE – SDC2: RESULTS

**TABLE SR4.** *Descriptive Statistics of the Snippet Review Scores per Indicator, and of the EMA Evaluation Survey Question on the Snippet’s Usefulness. Presented for All Snippets Lumped Together (Top Row), and Different Snippet Subgroups (Lower Rows). Unless Indicated Otherwise, Medians and 25<sup>th</sup> and 75<sup>th</sup> Percentile Points Are Presented.*

|                                                     | Snippet Review Scores (Possible Range 1-5)     |                |                |                     |                  |                |                              | EMA Evaluation Survey Question on Snippet Usefulness* |                                              |                                              |
|-----------------------------------------------------|------------------------------------------------|----------------|----------------|---------------------|------------------|----------------|------------------------------|-------------------------------------------------------|----------------------------------------------|----------------------------------------------|
|                                                     | No. of Observations (Unique SNs; Participants) | Useful         | Interes-ting   | Fun/ Enter- taining | Understan- dable | Appealing Tone | Appropriate length/ duration | No. of Observations (Unique SNs; Participants)        | Response Options                             | No. of Obser- vations (%)                    |
| All SNs                                             | 635 (107; n=25)                                | 4.0 [3.0; 5.0] | 4.0 [3.0; 5.0] | 3.0 [2.0; 4.0]      | 4.0 [4.0; 5.0]   | 4.0 [3.0; 4.0] | 4.0 [3.0; 4.0]               | -                                                     | -                                            | -                                            |
| Offered SNs                                         | 424 (70; n=24)                                 | 4.0 [3.0; 5.0] | 4.0 [3.0; 5.0] | 3.0 [2.0; 4.0]      | 4.0 [4.0; 5.0]   | 4.0 [3.0; 4.0] | 4.0 [3.0; 4.0]               | 313 (70; n=23)                                        | 1) No<br>2) A bit<br>3) Much<br>4) Very much | 110 (35%)<br>158 (50%)<br>40 (13%)<br>5 (2%) |
| Offered SNs- acoustically tailored <sup>o</sup>     | 322 (46; n=23)                                 | 4.0 [3.0; 5.0] | 4.0 [3.0; 5.0] | 3.0 [2.0; 4.0]      | 4.0 [4.0; 5.0]   | 4.0 [3.0; 4.0] | 4.0 [3.0; 5.0]               | 228 (45; n=22)                                        | 1) No<br>2) A bit<br>3) Much<br>4) Very much | 67 (29%)<br>124 (54%)<br>33 (15%)<br>4 (2%)  |
| Offered SNs- not acoustically tailored <sup>o</sup> | 102 (33; n=19)                                 | 4.0 [3.0; 5.0] | 4.0 [3.0; 5.0] | 2.0 [1.0; 3.0]      | 4.0 [4.0; 5.0]   | 3.0 [3.0; 4.0] | 4.0 [3.0; 4.0]               | 85 (33; n=17)                                         | 1) No<br>2) A bit<br>3) Much<br>4) Very much | 43 (51%)<br>34 (40%)<br>7 (8%)<br>1 (1%)     |

HEAR-AWARE APP – ACCEPTABILITY AND STAGES OF CHANGE – SDC2: RESULTS

|                                                |                |                |                |                |                |                |                |               |                                              |                                            |
|------------------------------------------------|----------------|----------------|----------------|----------------|----------------|----------------|----------------|---------------|----------------------------------------------|--------------------------------------------|
| Standard library SNs                           | 211 (37; n=22) | 4.0 [3.0; 5.0] | 4.0 [4.0; 5.0] | 3.0 [2.0; 4.0] | 4.0 [4.0; 5.0] | 4.0 [3.0; 4.0] | 4.0 [3.0; 4.0] | -             | -                                            | -                                          |
| All SNs with main TB Communication Strategies  | 115 (9; n=24)  | 4.0 [3.0; 4.0] | 4.0 [3.0; 4.0] | 3.0 [2.0; 4.0] | 4.0 [4.0; 5.0] | 4.0 [3.0; 4.0] | 4.0 [3.0; 4.0] | 68 (8; n=21)  | 1) No<br>2) A bit<br>3) Much<br>4) Very much | 13 (19%)<br>39 (57%)<br>15 (22%)<br>1 (2%) |
| All SNs with main TB Hearing Aids              | 111 (23; n=22) | 4.0 [3.0; 5.0] | 4.0 [3.0; 4.0] | 3.0 [1.0; 4.0] | 4.0 [4.0; 5.0] | 4.0 [3.0; 4.0] | 4.0 [3.0; 4.0] | 53 (16; n=16) | 1) No<br>2) A bit<br>3) Much<br>4) Very much | 23 (43%)<br>24 (45%)<br>5 (10%)<br>1 (2%)  |
| All SNs with main TB Emotional Coping          | 28 (5; n=14)   | 4.0 [4.0; 5.0] | 4.0 [4.0; 5.0] | 3.0 [2.0; 4.0] | 4.0 [4.0; 5.0] | 4.0 [3.0; 4.0] | 4.0 [4.0; 4.0] | 22 (4; n=12)  | 1) No<br>2) A bit<br>3) Much<br>4) Very much | 6 (27%)<br>14 (64%)<br>2 (9%)<br>0 (0%)    |
| All SNs with main TB Social Support            | 34 (3; n=16)   | 4.0 [3.8; 5.0] | 4.0 [3.8; 5.0] | 3.0 [2.0; 4.3] | 4.0 [4.0; 5.0] | 4.0 [3.0; 5.0] | 4.0 [4.0; 5.0] | 27 (3; n=16)  | 1) No<br>2) A bit<br>3) Much<br>4) Very much | 7 (26%)<br>19 (71%)<br>1 (4%)<br>0 (0%)    |
| All SNs with main TB ALDs without hearing aids | 20 (3; n=14)   | 3.5 [3.0; 4.8] | 3.5 [3.0; 4.0] | 3.0 [1.3; 4.0] | 4.0 [4.0; 5.0] | 4.0 [3.3; 4.0] | 4.0 [3.0; 4.8] | 10 (2; n=9)   | 1) No<br>2) A bit<br>3) Much<br>4) Very much | 5 (50%)<br>3 (30%)<br>2 (20%)<br>0 (0%)    |

HEAR-AWARE APP – ACCEPTABILITY AND STAGES OF CHANGE – SDC2: RESULTS

|                                             |                |                |                |                |                |                |                |                |                                              |                                            |
|---------------------------------------------|----------------|----------------|----------------|----------------|----------------|----------------|----------------|----------------|----------------------------------------------|--------------------------------------------|
| All SNs with main TB ALDs with hearing aids | 39 (4; n=18)   | 4.0 [3.0; 5.0] | 4.0 [3.0; 5.0] | 3.0 [2.0; 4.0] | 4.0 [4.0; 5.0] | 4.0 [3.0; 4.0] | 4.0 [3.0; 4.0] | 32 (4; n=16)   | 1) No<br>2) A bit<br>3) Much<br>4) Very much | 11 (34%)<br>15 (47%)<br>4 (13%)<br>2 (6%)  |
| All SNs with no TB                          | 288 (60; n=24) | 4.0 [3.0; 5.0] | 4.0 [4.0; 5.0] | 3.0 [2.0; 4.0] | 4.0 [4.0; 5.0] | 4.0 [3.0; 4.0] | 4.0 [3.0; 4.0] | 115 (37; n=21) | 1) No<br>2) A bit<br>3) Much<br>4) Very much | 46 (40%)<br>55 (48%)<br>13 (11%)<br>1 (1%) |

ALDs, Assistive listening devices; EMA, Ecological Momentary Assessment, No., number; SN, snippet; TB, target behavior; -, no data, not applicable.

\* Did the information / tips from the snippet that you received earlier today for this listening situation help you in any way?

◊ Acoustically tailored snippets: snippets that had 1-3 matching labels with the 1-3 acoustic labels activated during the EMA identification survey. Non-acoustically tailored snippets: snippets that had no acoustic label activated.

Tables SR5-SR10 show the cross-tabulations of the test-retest reliability results for the different Staging Algorithm measures (*Intraclass Correlation Coefficients, ICCs*, single measurement, absolute agreement, 2 way mixed effects model).

**TABLE SR5.** *Cross-tabulation of the Staging Algorithm Generic on T0 and T1. ICC = .74 (Good)*

| SoC on T0        | SoC on T1        |               |             |        | Total |
|------------------|------------------|---------------|-------------|--------|-------|
|                  | Precontemplation | Contemplation | Preparation | Action |       |
| Precontemplation | 0                | 0             | 0           | 0      | 0     |
| Contemplation    | 0                | 12            | 2           | 0      | 14    |
| Preparation      | 0                | 4             | 6           | 1      | 11    |
| Action           | 0                | 0             | 1           | 3      | 4     |
| Total            | 0                | 16            | 9           | 4      | 29    |

SoC, Stage of Change.

**TABLE SR6.** *Cross-tabulation of the Staging Algorithm Communication Strategies on T0 and T1. ICC = .72 (Good)*

| SoC on T0        | SoC on T1        |               |             |        | Total |
|------------------|------------------|---------------|-------------|--------|-------|
|                  | Precontemplation | Contemplation | Preparation | Action |       |
| Precontemplation | 3                | 2             | 0           | 0      | 5     |
| Contemplation    | 2                | 7             | 1           | 1      | 11    |
| Preparation      | 0                | 1             | 3           | 4      | 8     |
| Action           | 0                | 1             | 0           | 4      | 5     |
| Total            | 5                | 11            | 4           | 9      | 29    |

SoC, Stage of Change.

**TABLE SR7.** Cross-tabulation of the Staging Algorithm Hearing Aids on T0 and T1. ICC = .80

(Excellent)

| SoC on T0        | SoC on T1        |               |             |        | Total |
|------------------|------------------|---------------|-------------|--------|-------|
|                  | Precontemplation | Contemplation | Preparation | Action |       |
| Precontemplation | 1                | 0             | 0           | 0      | 1     |
| Contemplation    | 2                | 20            | 1           | 0      | 23    |
| Preparation      | 0                | 0             | 5           | 0      | 5     |
| Action           | 0                | 0             | 0           | 0      | 0     |
| Total            | 3                | 20            | 6           | 0      | 29    |

SoC, Stage of Change.

**TABLE SR8.** Cross-tabulation of the Staging Algorithm Emotional Coping on T0 and T1. ICC =

.51 (Fair)

| SoC on T0        | SoC on T1        |               |             |        | Total |
|------------------|------------------|---------------|-------------|--------|-------|
|                  | Precontemplation | Contemplation | Preparation | Action |       |
| Precontemplation | 13               | 0             | 2           | 1      | 16    |
| Contemplation    | 0                | 2             | 1           | 1      | 4     |
| Preparation      | 0                | 1             | 2           | 3      | 6     |
| Action           | 1                | 1             | 0           | 1      | 3     |
| Total            | 14               | 4             | 5           | 6      | 29    |

SoC, Stage of Change.

**TABLE SR9.** Cross-tabulation of the Staging Algorithm Social Support on T0 and T1. ICC = .72

(Good)

| SoC on T0        | SoC on T1        |               |             |        | Total |
|------------------|------------------|---------------|-------------|--------|-------|
|                  | Precontemplation | Contemplation | Preparation | Action |       |
| Precontemplation | 6                | 1             | 1           | 0      | 8     |
| Contemplation    | 2                | 4             | 1           | 0      | 7     |
| Preparation      | 1                | 0             | 3           | 3      | 7     |
| Action           | 1                | 0             | 0           | 6      | 7     |
| Total            | 10               | 5             | 5           | 9      | 29    |

SoC, Stage of Change.

**TABLE SR10.** Cross-tabulation of the Staging Algorithm Assistive Listening Devices on T0 and

T1. ICC = .69 (Good)

| SoC on T0        | SoC on T1        |               |             |        | Total |
|------------------|------------------|---------------|-------------|--------|-------|
|                  | Precontemplation | Contemplation | Preparation | Action |       |
| Precontemplation | 6                | 0             | 0           | 0      | 6     |
| Contemplation    | 4                | 14            | 2           | 0      | 20    |
| Preparation      | 0                | 1             | 1           | 0      | 2     |
| Action           | 0                | 0             | 1           | 0      | 1     |
| Total            | 10               | 15            | 4           | 0      | 29    |

SoC, Stage of Change.

HEAR-AWARE APP – ACCEPTABILITY AND STAGES OF CHANGE – SDC2: RESULTS

**TABLE SR11.** Correlation Coefficients (and their 95% Confidence Intervals) of the TB-specific and Generic SoC-scales, and Self-reported Hearing Disability, at T0 (N = 29)

| The Line (0 - 10)         | Generic                               | Communication Strategies            | Hearing Aids                         | Emotional Coping                    | Social Support                      | ALDs                                | Self-reported Hearing Disability (0 - 74) |
|---------------------------|---------------------------------------|-------------------------------------|--------------------------------------|-------------------------------------|-------------------------------------|-------------------------------------|-------------------------------------------|
| Generic                   | 1                                     | <b>.47*</b><br>(.10 - .72)          | <b>.44*</b><br>(.09 - .70)           | .36<br>(-.01 - .64)                 | .08 (-.29 - .44)                    | .15<br>(-.23 - .49)                 | .17 (-.21 - .50)                          |
| Communication Strategies  | <b>.47*</b><br>(.10 - .72)            | 1                                   | .10<br>(-.28 - .45)                  | .36<br>(-.02 - .65)                 | <b>.74**</b><br>(.48 - .88)         | .19<br>(-.19 - .52)                 | -.16<br>(-.50 - .22)                      |
| Hearing Aids              | <b>.44*</b><br>(.09 - .70)            | .10<br>(-.28 - .45)                 | 1                                    | .17<br>(-.21 - .51)                 | -.17<br>(-.50 - .21)                | .22<br>(-.16 - .54)                 | <b>.39*</b> (.03 - .66)                   |
| Emotional Coping          | .36<br>(-.01 - .64)                   | .36<br>(-.02 - .65)                 | .17<br>(-.21 - .51)                  | 1                                   | .19<br>(-.19 - .52)                 | -.01<br>(-.38 - .35)                | -.24 (-.56 - .14)                         |
| Social Support            | .08<br>(-.29 - .44)                   | <b>.74**</b><br>(.48 - .89)         | -.17<br>(-.50 - .21)                 | .19<br>(-.19 - .52)                 | 1                                   | .10<br>(-.28 - .45)                 | .02 (-.35 - .39)                          |
| ALDs                      | .15<br>(-.23 - .49)                   | .190<br>(-.19 - .52)                | .22<br>(-.16 - .54)                  | -.01<br>(-.38 - .35)                | .10<br>(-.28 - .45)                 | 1                                   | .23 (-.15 - .55)                          |
| Staging Algorithm (0 - 3) | Generic                               | Communication Strategies            | Hearing Aids                         | Emotional Coping                    | Social Support                      | ALDs                                | Self-reported Hearing Disability (0 - 74) |
| Generic                   | 1                                     | .21<br>(-.12 - .53)                 | <b>.25*</b><br>( <b>-.07 - .54</b> ) | .11<br>(-.15 - .40)                 | .06<br>(-.31 - .41)                 | .11<br>(-.12 - .39)                 | .15<br>(-.24 - .50)                       |
| Communication Strategies  | .21<br>(-.12 - .53)                   | 1                                   | -.05<br>(-.38 - .31)                 | <b>.34*</b><br>( <b>.01 - .62</b> ) | <b>.70**</b><br>( <b>.45-.85</b> )  | .22<br>(-.10 - .51)                 | -.20<br>(-.54 - .19)                      |
| Hearing Aids              | <b>.25 *</b><br>( <b>-.07 - .54</b> ) | -.05<br>(-.38 - .31)                | 1                                    | .08<br>(-.28 - .42)                 | -.08<br>(-.42 - .28)                | .14<br>(-.21 - .47)                 | <b>.45*</b><br>(.09 - .71)                |
| Emotional Coping          | .11<br>(-.15 - .40)                   | <b>.34*</b><br>( <b>.01 - .62</b> ) | .08<br>(-.28 - .42)                  | 1                                   | <b>.55*</b><br>( <b>.19 - .77</b> ) | <b>.52*</b><br>( <b>.20 - .75</b> ) | -.22<br>(-.55 - .17)                      |

HEAR-AWARE APP – ACCEPTABILITY AND STAGES OF CHANGE – SDC2: RESULTS

|                |                     |                                    |                      |                                   |                     |                     |                      |
|----------------|---------------------|------------------------------------|----------------------|-----------------------------------|---------------------|---------------------|----------------------|
| Social Support | .06<br>(-.31 - .41) | <b>.70**</b><br><b>(.45 - .85)</b> | -.08<br>(-.42 - .28) | <b>.55*</b><br><b>(.19 - .77)</b> | 1                   | .14<br>(-.21 - .47) | -.23<br>(-.56 - .16) |
| ALDs           | .11<br>(-.12 - .39) | .22<br>(-.10 - .51)                | .14<br>(-.21 - .47)  | <b>.52*</b><br><b>(.20 - .75)</b> | .14<br>(-.21 - .47) | 1                   | -.09<br>(-.45 - .30) |

\* Statistically significant ( $p < .05$ ), but correlation coefficient  $< .60$ ;

\*\* Statistically significant ( $p < .01$ ), and correlation coefficient  $\geq .60$

ALDs, Assistive Listening Devices without hearing aids.

**TABLE SR12.** *Frequencies of Combinations of SoC<sub>person</sub> and SoC<sub>snippet</sub>, with Associated**SoC<sub>difference</sub> Scores Presented between Brackets (N = 25)*

| SoC <sub>snippet</sub> | SoC <sub>person</sub> |               |             |         | Total |
|------------------------|-----------------------|---------------|-------------|---------|-------|
|                        | Precontemplation      | Contemplation | Preparation | Action  |       |
| Precontemplation       | 3 (0)                 | 78 (-1)       | 12 (-2)     | 19 (-3) | 112   |
| Contemplation          | 17 (1)                | 222 (0)       | 64 (-1)     | 57 (-2) | 360   |
| Preparation            | 26 (2)                | 68 (1)        | 35 (0)      | 34 (-1) | 163   |
| Action                 | 0                     | 0             | 0           | 0       | 0     |
| Total                  | 46                    | 368           | 111         | 110     | 635   |

*Note.* One participant had not reviewed any snippets, so data of 25 participants were used in the analyses. SoC, Stage of Change.
